# Supplementary material
Source: Springer Nature journal article supplement (https://www.springermedizin.de/resource/supplementary/12889_2014_7362_MOESM1_ESM.pdf/9497040)

### Sex

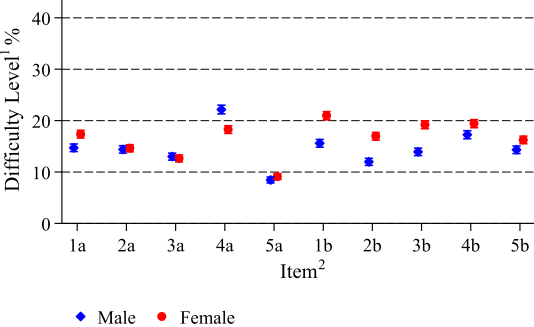

### Age

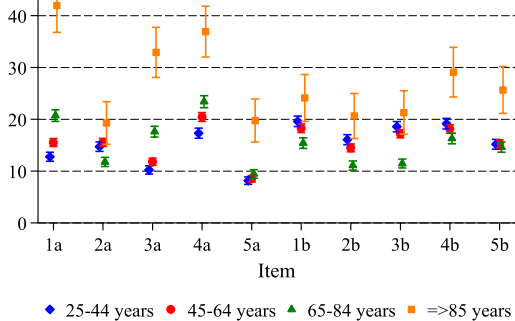

### Origin

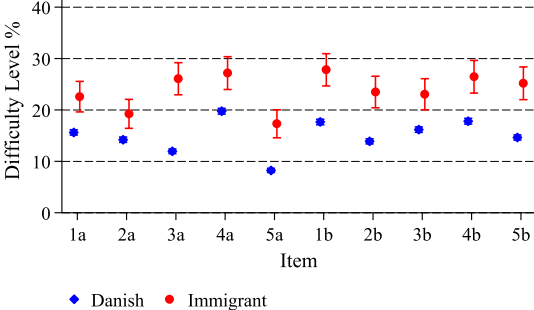

### Mother tongue

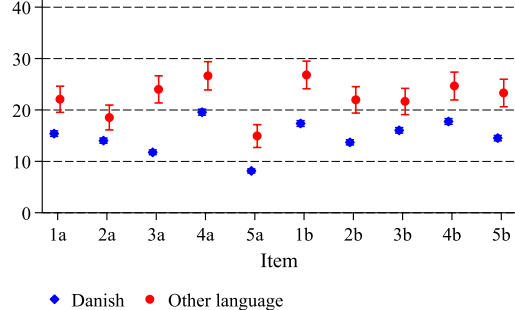

### Cohabitation

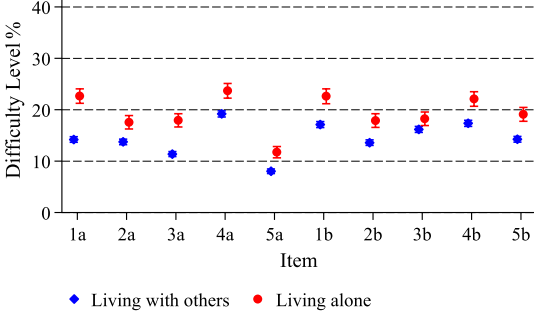

### Personal annual gross income

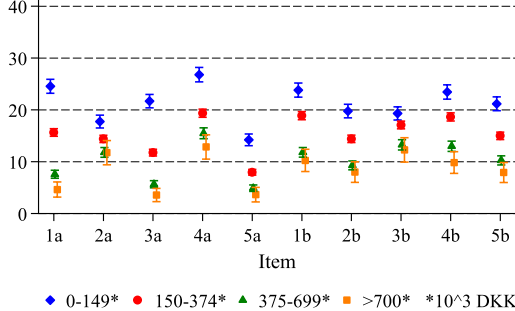

### Education

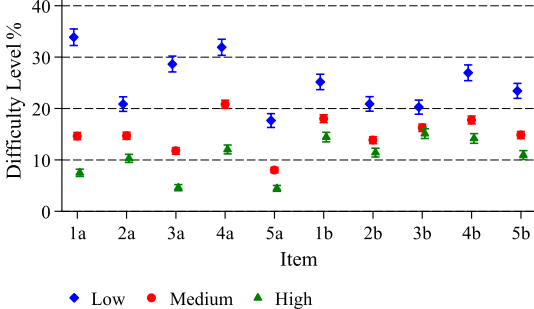

### Visits at the general practitioner in the last year

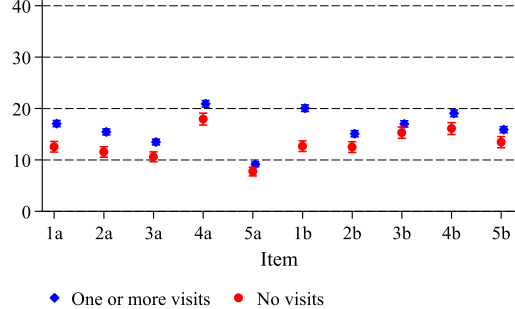

Supplement: MOESM1 [file 9497040]
